# Supplementary material for: Definition of the transcriptional units of inherited retinal disease genes by meta-analysis of human retinal transcriptome data
Source: PubMed Central journal article supplement (PMC10111803; doi:10.1186/s12864-023-09300-w), 2023-04-18
Supplement: 12864_2023_9300_MOESM7_ESM.pdf [file 12864_2023_9300_MOESM7_ESM.pdf]

### Supplementary Table S1

Oligonucleotides primers used in this study:

| Oligonucleotide name | Oligonucleotide Forward sequence | Oligonucleotide Reverse sequence | Annealing temperature |
|----------------------|----------------------------------|----------------------------------|-----------------------|
| PRPH2                | AACAACGGTTTTTCGGGACTGG           | CGCAGCCCAATTGTAATGGTC            | 56 °C                 |
| GRK1                 | AGCTGTATGCCTGCAAGAAGC            | TGGAGTTCAGTTTGGTGACGG            | 56 °C                 |
| MERTK                | GAATGAAATAGGCTGGTCTGC            | GGAGTCAACAGTAGAAGAGAG            | 56 °C                 |
| hybrid RDHBLO        | GGAGAACTTCAACCAGGCACT            | TTCTCCAGACTCTCCAGGTTG            | 56 °C                 |
| KIAA1549             | TCCCTCAGATGCTGACTCTAC            | GTGGGATCACTTTCCTCCAG             | 56 °C                 |
| MAK                  | CAGAGGATCCACTTAGCACCT            | CCATGATTGCATCCCTGCACT            | 56 °C                 |
| PLA2G5               | TGCCCAAGGAAGTTGCTCATG            | TTGTGTTGCAATGTCTCTCCC            | 56 °C                 |

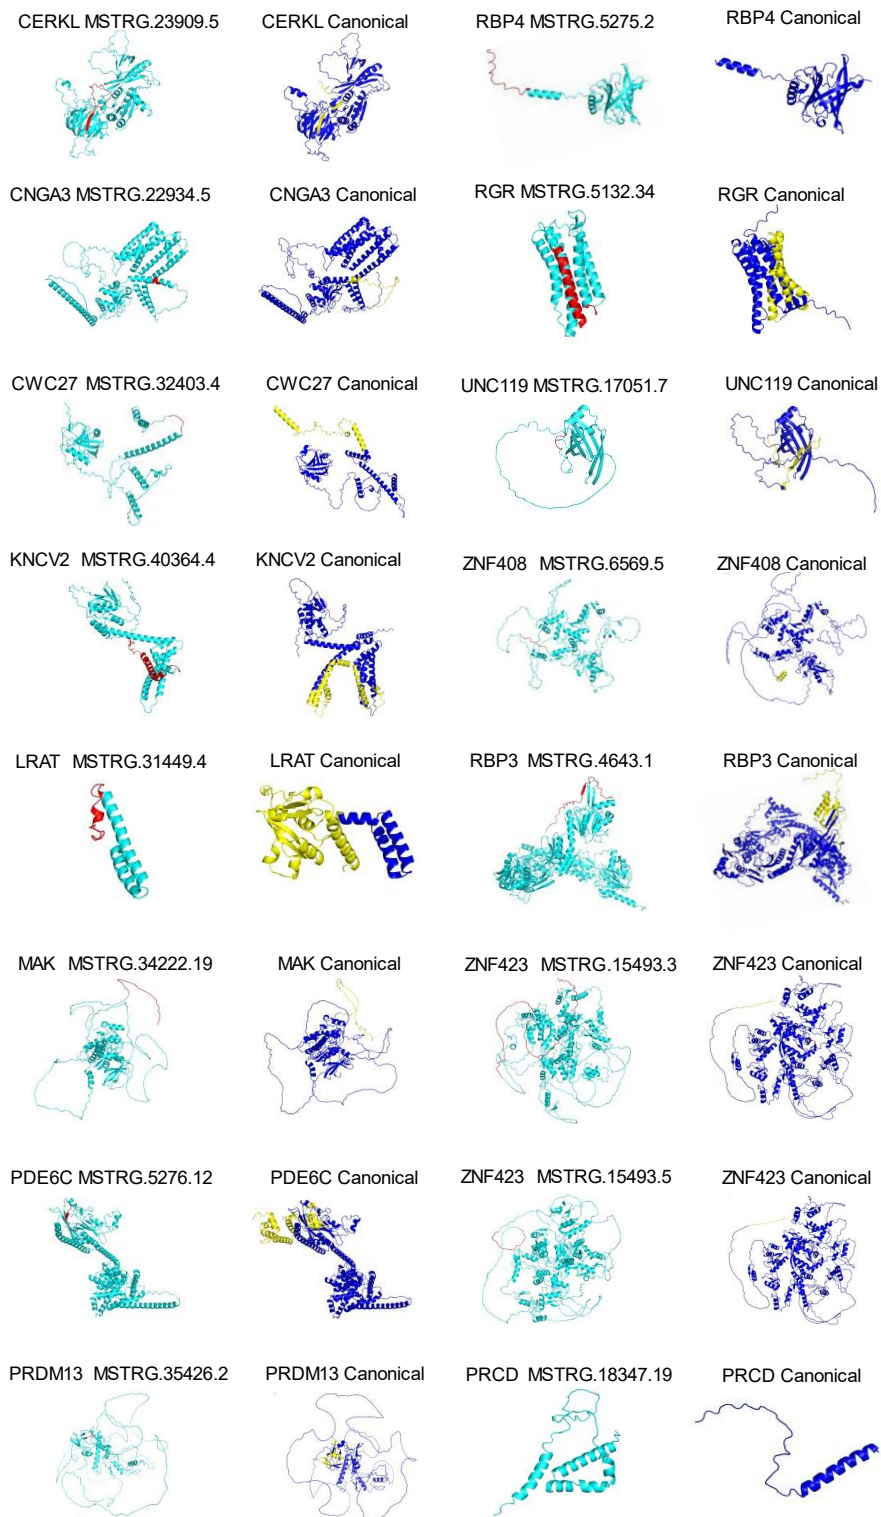

**Figure S1.** Predicted 3D protein structures encoded by the novel HEITs (light blue) compared with their corresponding canonical forms (dark blue). Protein modelling was carried out with AlphaFold2 and ColabFold. The distinguishing features between the novel and the canonical proteins are highlighted in red and yellow, respectively.

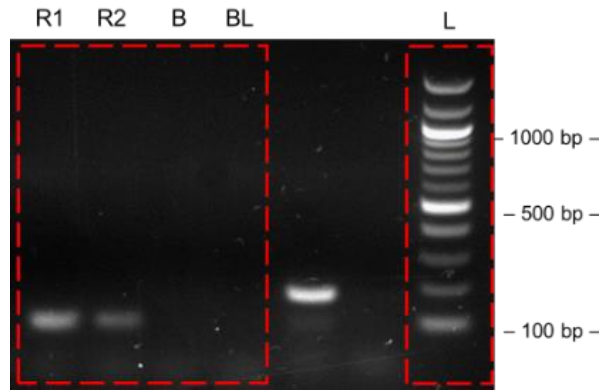

Source data

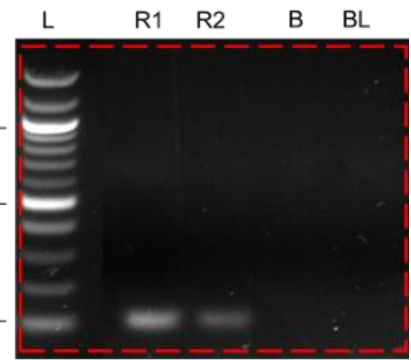

Fig 3b - *GRK1*

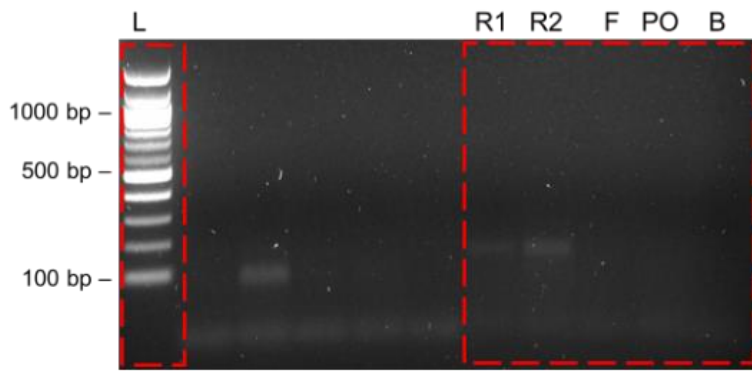

Source data

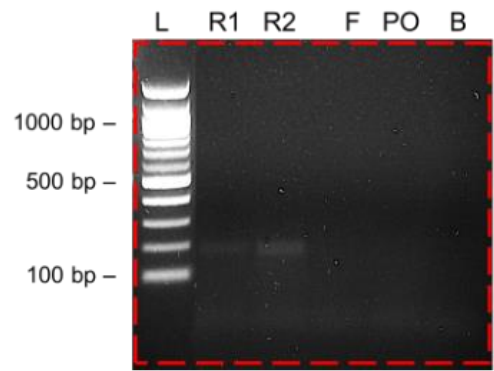

Fig 3d - *KIAA1549*

**Figure S2.** Source data for Figure 3.
